# Supplementary material for: Copper affects the binding of HIF-1α to the critical motifs of its target genes
Source: Royal Society of Chemistry journal article supplement (doi:10.1039/c8mt00280k), 2018-12-14
Supplement: c8mt00280k1.pdf [file c8mt00280k1.pdf]

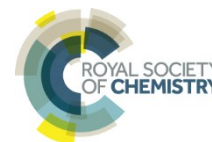

## Journal Name

### ARTICLE

#### Supplementary Information for:

### Copper affects the binding of HIF-1 $\alpha$ to the critical motifs of its target genes

Zhijuan Wu, <sup>†a</sup> Wenjing Zhang <sup>†ab</sup> and Y. James Kang <sup>\*ab</sup>

<sup>a</sup>Regenerative Medicine Research Center, Sichuan University West China Hospital, Chengdu, Sichuan 610041, China

<sup>b</sup>Memphis Institute of Regenerative Medicine, University of Tennessee Health Science Center, Memphis, TN, USA

\*Corresponding address: Y. James Kang, Regenerative Medicine Research Center, Sichuan University West China Hospital, Chengdu, Sichuan 610041, China; ykang7@uthsc.edu

† These authors contributed equally to this study.

|                                                                                                                                                     |   |
|-----------------------------------------------------------------------------------------------------------------------------------------------------|---|
| Table S1. Binding sites of HIF-1 $\alpha$ and the coupled genes in promoters .....                                                                  | 2 |
| Table S2. Binding sites of HIF-1 $\alpha$ and the coupled genes in putative enhancer regions .....                                                  | 2 |
| Table S3. List of 281 Cu-dependent genes and 10 Cu-independent genes.....                                                                           | 3 |
| Figure S1. Identification of TEPA treatment conditions, ultrasonic time and specific HIF-1 $\alpha$ antibody for ChIP-seq. ....                     | 4 |
| Figure S2. The differential mRNA expression of HIF-1 target genes induced by the selective regulation of Cu on HIF-1 $\alpha$ binding pattern. .... | 5 |
| Figure S3. GO and pathway analyses of Cu-dependent genes. ....                                                                                      | 6 |

## Supplementary Tables

Table S1 Binding sites of HIF-1 $\alpha$  and the coupled genes in promoters

|                      | HIF-1 $\alpha$ binding sites in 500 bp of TSS | Overlapped sites with Pol II (promoters) | Genes assigned to promoters |
|----------------------|-----------------------------------------------|------------------------------------------|-----------------------------|
| Class 1              | 931                                           | 917                                      | 907                         |
| Class 2              | 149                                           | 147                                      | 147                         |
| Class 3_Hypoxia      | 642                                           | 630                                      | 626                         |
| Class 3_TEPA+Hypoxia | 636                                           | 628                                      | 621                         |
| Class 3 (RPs)        | -                                             | 624                                      | 616                         |
| Class 3 (DPs)        | -                                             | 6                                        | 6                           |

Table S2 Binding sites of HIF-1 $\alpha$  and the coupled genes in putative enhancer regions

|                      | Overlapped HIF-1 $\alpha$ binding sites with H3K27ac in 20 kb of TSS | Putative enhancers (except the overlapped sites in promoters) | Genes assigned to putative enhancers |
|----------------------|----------------------------------------------------------------------|---------------------------------------------------------------|--------------------------------------|
| Class 1              | 1430                                                                 | 490                                                           | 441                                  |
| Class 2              | 190                                                                  | 39                                                            | 37                                   |
| Class 3_Hypoxia      | 1083                                                                 | 425                                                           | 348                                  |
| Class 3_TEPA+Hypoxia | 1080                                                                 | 433                                                           | 351                                  |
| Class 3 (RPs)        | -                                                                    | 97                                                            | 95                                   |
| Class 3 (DPs)        | -                                                                    | 328                                                           | 273                                  |

Table S3 List of 281 Cu-dependent genes and 10 Cu-independent genes

| Cu-dependent genes   |              |            |              |         |              |              |          |
|----------------------|--------------|------------|--------------|---------|--------------|--------------|----------|
| ABHD17A              | C1orf35      | EEF1D      | IMP3         | MFSD12  | PES1         | RPL37        | TLCD1    |
| ACAP3                | C2orf81      | EFNA3      | ISG20        | MIF     | PFKL         | RPL41        | TLE6     |
| ACSF3                | CBX5         | EGFL7      | JUND         | MIR6805 | PGLS         | RPL6         | TMEM134  |
| ALDOA                | CCDC106      | EIF3F      | KMT2E-AS1    | MPG     | PHPT1        | RPP25        | TMEM255B |
| ALYREF               | CCDC12       | EIF4EBP1P1 | LAMTOR5      | MRPL11  | PIDD1        | RPS14        | TMEM44   |
| ANGPTL4              | CCDC124      | ENG        | LBHD1        | MRPL17  | PIH1D1       | RPS15        | TNFRSF6B |
| ANKRD37              | CCDC85B      | ENO1       | LIMS2        | MRPL23  | PINX1        | RPS19        | TNNT1    |
| ANKS3                | CCDC94       | ERCC1      | LOC100133985 | MRPL46  | PKP3         | RPS21        | TPRA1    |
| APITD1               | CD320        | EXD3       | LOC100287036 | MRPL53  | POC1A        | RPS26        | TPT1     |
| APOPT1               | CDC42EP2     | EXOSC4     | LOC100289361 | MRPS24  | POLD2        | RPS3         | TRMU     |
| APRT                 | CDKN2AIPNL   | EXOSC5     | LOC100505771 | MT2A    | POLR2L       | RPS3A        | TUBB4B   |
| ARL6IP4              | CENPV        | FAM173A    | LOC100506922 | MTFP1   | PPIH         | RPS7         | UCKL1    |
| ARPC4                | CFDP1        | FAM207A    | LOC100996732 | MYL6B   | PPP1R3G      | RWDD1        | UPP1     |
| ATAD3A               | CHMP6        | FAM69B     | LOC101927245 | NARFL   | PPP6R1       | S100A10      | UROD     |
| ATG101               | CITED4       | FASTK      | LOC101928837 | NDUFA13 | PRKCSH       | S100A16      | USE1     |
| ATP5J2               | CLPP         | FBXL15     | LOC101929494 | NDUFB8  | PRPF31       | S100A6       | VKORC1   |
| ATP5L                | CMC2         | FBXW5      | LOC102723811 | NDUFC1  | PRR7         | SEC61B       | VTI1B    |
| ATP5O                | CMTM7        | FLOT1      | LOC102723897 | NDUFS7  | PRRT3-AS1    | SENCR        | WASH7P   |
| ATR                  | COA6         | GADD45GIP1 | LOC102724064 | NELFB   | PSCA         | SERTAD1      | WDR74    |
| AURKAIP1             | COPZ2        | GAPDH      | LOC102724193 | NFKB2   | PSMA7        | SLC39A3      | WISP2    |
| B4GALT7              | COQ4         | GCAT       | LOC105369340 | NME1    | PTGES2       | SNHG11       | XPNPEP1  |
| B9D1                 | COX4I1       | GLI4       | LOC105369347 | NME2    | PTRH2        | SNHG17       | ZBTB45   |
| B9D2                 | CPNE7        | GLTSCR2    | LOC105371318 | NNMT    | R3HCC1       | SNHG7        | ZNF524   |
| BANF1                | CPSF1        | GNB2       | LOC105372480 | NOC2L   | RAB11B-AS1   | SNRPB        | ZNF580   |
| BIN1                 | CRABP2       | GNPTG      | LOC105372652 | NOL12   | RANBP1       | SNRPD1       | ZNF653   |
| BLOC1S1              | DDT          | GPX1       | LOC105372884 | NOL3    | REXO1        | SNRPE        | ZNF771   |
| BOLA2B               | DDX54        | GUK1       | LOC284454    | NSMCE1  | RFXANK       | SPAG4        | ZNF837   |
| BOLA3                | DHRS3        | HAUS8      | LOC79160     | NTSR1   | RHOT2        | SPC24        | ZNHIT2   |
| C10orf10             | DMAP1        | HCFC1R1    | LOC91450     | NUDT18  | RIN1         | SPSB2        | ZSWIM7   |
| C11orf31             | DNAJB2       | HINT1      | LY6K         | NUTF2   | RNASSET2     | SRA1         |          |
| C14orf80             | DNLZ         | HMGCL      | MACROD1      | NVL     | RPL13AP20    | SSSCA1       |          |
| C15orf52             | DOHH         | HOOK2      | MAF1         | OCEL1   | RPL18        | STRA13       |          |
| C16orf13             | DPCD         | HYI        | MBD3         | P3H3    | RPL27        | SURF6        |          |
| C16orf91             | DUS1L        | ICT1       | MDP1         | PARK7   | RPL29        | TBRG4        |          |
| C19orf24             | DUS3L        | ID1        | MEG9         | PDLIM4  | RPL3         | TFB1M        |          |
| C19orf48             | DYNLRB1      | IER2       | METTL12      | PEMT    | RPL32        | THOC6        |          |
| Cu-independent genes |              |            |              |         |              |              |          |
| ADM                  | DDIT4        | ENO2       | LDHD         | THAP8   | LOC101927512 | LOC105372497 | MROH8    |
| SLC2A1-AS1           | LOC100506691 |            |              |         |              |              |          |

## Supplementary Figures

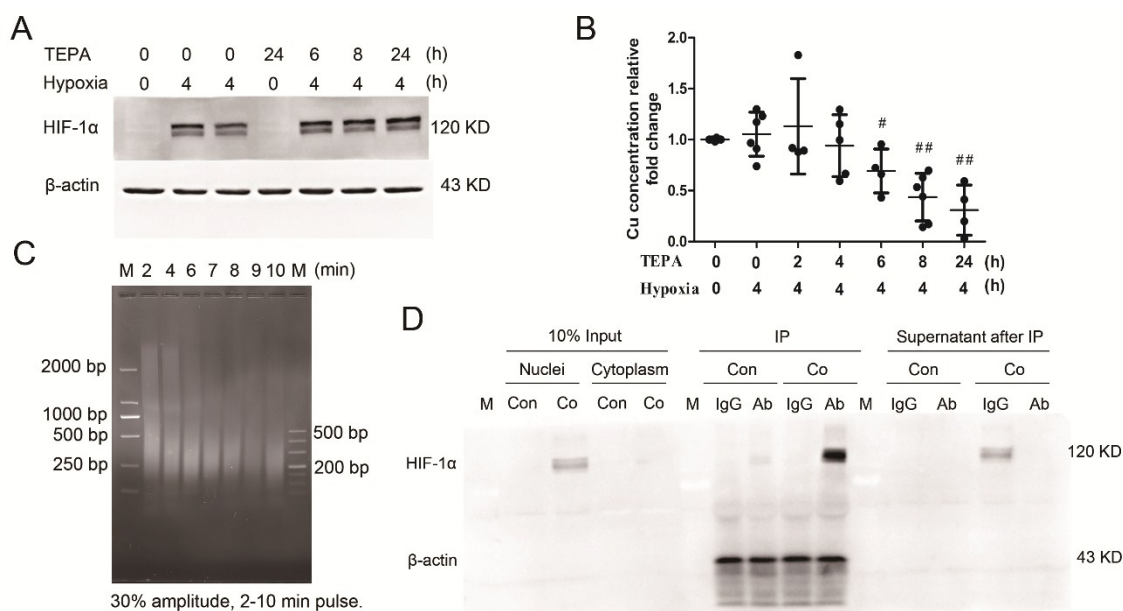

Fig S1. Identification of TEPA treatment conditions, ultrasonic time and specific HIF-1 $\alpha$  antibody for ChIP-seq. (A) Western blot analysis of HIF-1 $\alpha$  protein accumulation and (B) AAS analysis of Cu concentration under TEPA pretreated hypoxic condition. (C) Analysis of interrupted DNA fragments by ultrasonic treatment of the hypoxic cells, cultured and crosslinked by 1% formaldehyde. (D) Verifying the specificity of HIF-1 $\alpha$  antibody (NB100-134) for our ChIP-seq by IP assay and Western blot. Cells were treated with 100  $\mu$ M CoCl<sub>2</sub> for 16 h to induce HIF-1 $\alpha$  accumulation. Then HIF-1 $\alpha$ -bound proteins were captured by IP assay with the antibody NB100-134 and analyzed by Western blot.

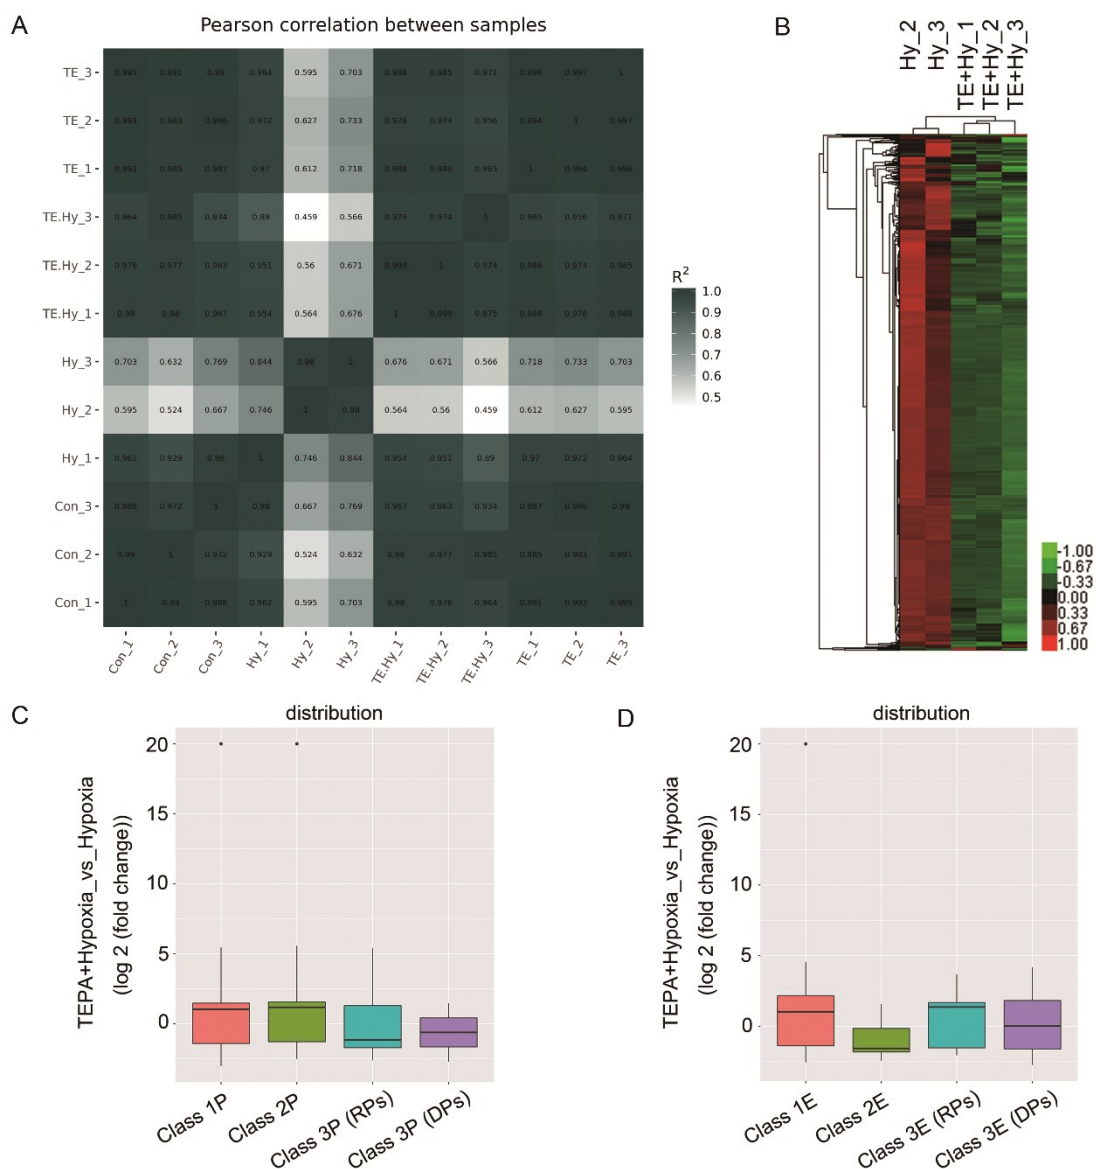

Fig S2. The differential mRNA expression of HIF-1 target genes induced by the selective regulation of Cu on HIF-1 $\alpha$  binding pattern. (A) Pearson correlation analysis of RNA-seq data. (B) Heat map of mRNA expression levels of the 2444 genes that upregulated under hypoxia stimulation, among which 2156 genes were significantly downregulated by Cu deprivation induced by TEPA. (C) & (D) Box plots show the distributions of mRNA expression differential data from TEPA-treated hypoxic group compared to TEPA-untreated hypoxic group in each class.

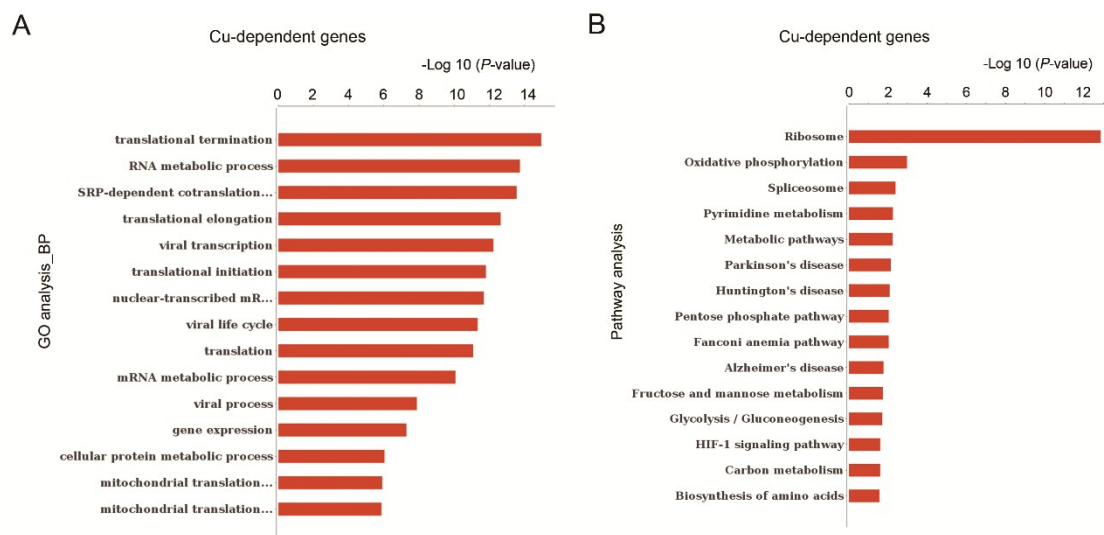

Fig S3. GO and pathway analyses of Cu-dependent genes. (A) GO and (B) pathway analyses of Cu-dependent genes.
